# Supplementary material
Source: publisher figshare collection journal article supplement (https://acs.figshare.com/ndownloader/files/5138956)
Supplement: Supplementary file 1 [file 5138956]

**Supporting Information:**

**Orientational Effect of Surface-Confined Cyclodextrin on the Inclusion of Bisphenols.**

**Hiroshi Endo, Tadashi Nakaji-Hirabayashi, Shinta Morokoshi, Makoto Gemmei-Ide and Hiromi Kitano**

*Department of Chemical and Biochemical Engineering, Toyama University, Toyama 930-8555, Japan*

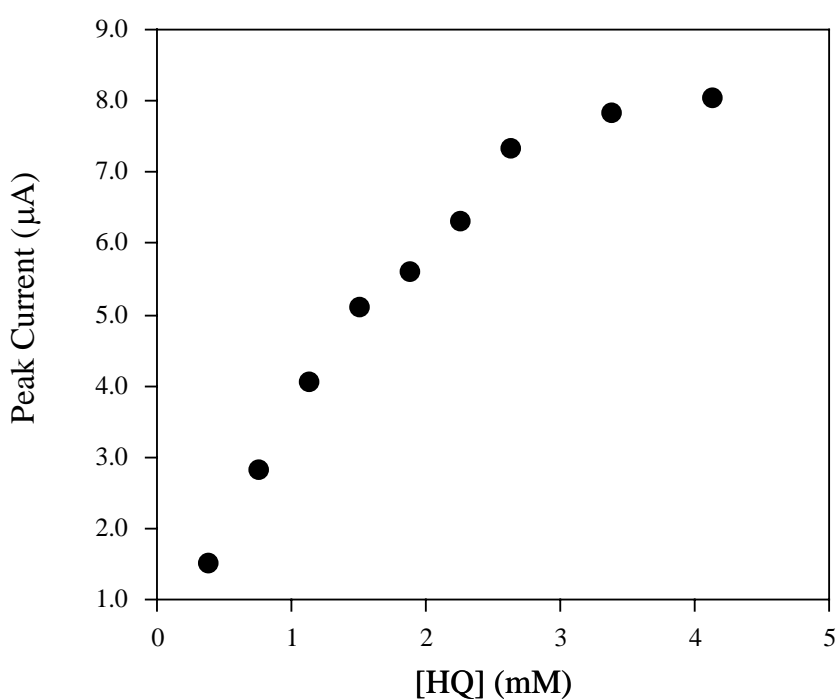

**Supplement Figure 1.** The dependence of anodic peak current on the concentration of HQ for the DTUA- $\beta$ -CD-modified electrode dipped in 0.1 M  $\text{Na}_2\text{SO}_4$  at 25 °C. Scan rate = 100 mV/s.

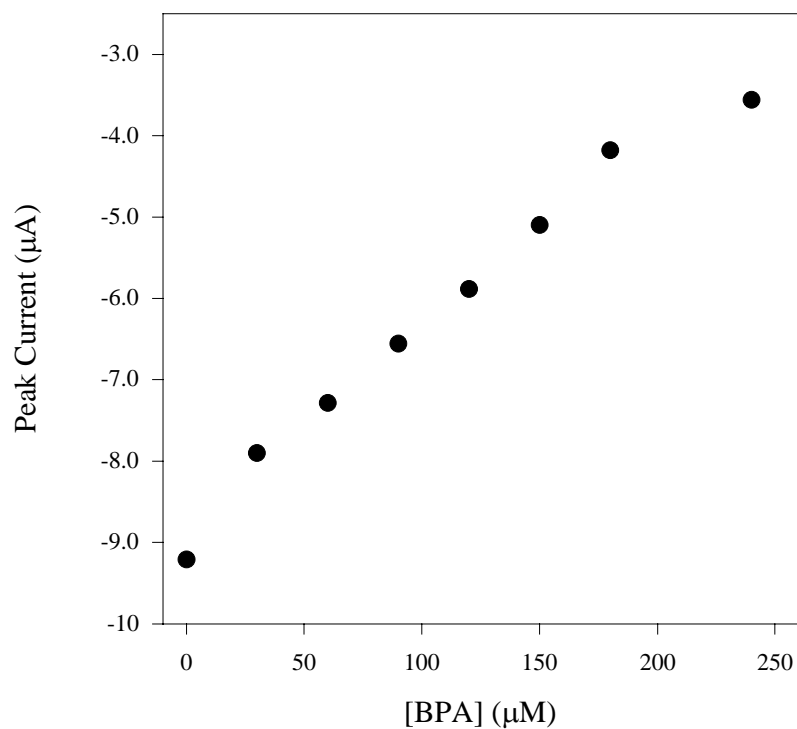

**Supplement Figure 2.** The dependence of cathodic peak current of 3.0 mM HQ on the concentration of added BPA for the DTUA- $\beta$ -CD-modified electrode immersed in 10 mM phosphate buffer (pH 7.0) containing 10 (v/v) % MeOH at 25 °C. Scan rate = 100 mV/s.

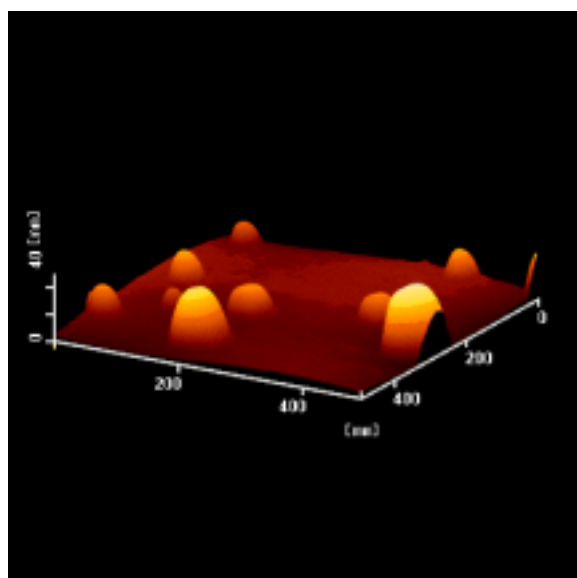

**Supplement Figure 3.** AFM image of colloidal gold on the amine-terminated glass surface
